# Supplementary material for: The Effects of Flavonoid Apigenin on Male Reproductive Health: Inhibition of Spermatogonial Proliferation through Downregulation of Prmt7/Akt3 Pathway
Source: MDPI journal article supplement (doi:10.3390/ijms222212209), 2021-11-11
Supplement: s1 [file s1]

**Table S1.** The primers for RT-qPCR used in this study.

| Gene name      |   | Primer sequences       |
|----------------|---|------------------------|
| <i>β-actin</i> | F | TGTGCTGTCCCTGTATGCCTCT |
|                | R | TAGATGGGCACAGTGTGGGTGA |
| <i>Ccna2</i>   | F | TGGATGGCAGTTTTGAATCACC |
|                | R | CCCTAAGGTACGTGTGAATGTC |
| <i>Ccnb1</i>   | F | CAGGCAAGAGTGCCTCTGAA   |
|                | R | GTTTCCATCGGGCTTGAGAA   |
| <i>Cdk1</i>    | F | AAGTGTGGCCAGAAGTCGAG   |
|                | R | TCGTCCAGGTTCTTGACGTG   |
| <i>Cdk2</i>    | F | CGGAGTGGTGTACAAAGCCA   |
|                | R | TCGGATGGCAGTACTGGGTA   |
| <i>Bcl2</i>    | F | GAAGTGGGGGAGGATTGTGG   |
|                | R | GCATGCTGGGGCCATATAGT   |
| <i>Bax</i>     | F | ATGGACGGGTCCGGGGAGCA   |
|                | R | CCCAGTTGAAGTTGCCGTCA   |
| <i>P53</i>     | F | CTCTCCCCCGCAAAGAAAAA   |
|                | R | CGGAACATCTCGAAGCGTTTA  |
| <i>Prmt7</i>   | F | GGAGATTGCCAGGTCATCCT   |
|                | R | GAAGTCAGCCCCTGCAGTAA   |
| <i>Akt1</i>    | F | ATGAACGACGTAGCCATTGTG  |
|                | R | TTGTAGCCAATAAAGGTGCCAT |
| <i>Akt2</i>    | F | ACGTGGTGAATACATCAAGACC |
|                | R | CTACAGAGAAATTGTTCAAGGG |
| <i>Akt3</i>    | F | ACCGCACACGTTTCTATGGT   |
|                | R | CGGCTCGGCCATAGTCATTA   |
| <i>Gfra1</i>   | F | AGGCTCAGAATTTGTTAATGG  |
|                | R | TAGGGCTCAAGGGAAGGAAG   |
| <i>Kit</i>     | F | GGCCTCACGAGTTCTATTTACG |
|                | R | GGGGAGAGATTTCCTATCACAC |
| <i>Ccne1</i>   | F | GCTTCGGGTCTGAGTTCCAA   |
|                | R | GTCTTGCAAAAACACGGCCA   |
| <i>Hap1</i>    | F | AGTTCATCACTGACCCTGCG   |
|                | R | GTTCTCTTCTGCCTGCCCCAT  |
| <i>Lcor1</i>   | F | GCCTCATGCACTGTGTAGGT   |
|                | R | CTCCTCTGTTGGCGTTGACT   |
| <i>Atg9b</i>   | F | ACCCTTGCTTCATGTACCCG   |
|                | R | TAATCCACGCAGCGAAGGAG   |
| <i>Pak1</i>    | F | ACTATGATTGGAGCCGGCAG   |
|                | R | TGGCATTCCCGTAAACTCCC   |
| <i>Rtf1</i>    | F | CTCGGATACGGAAGACAGCG   |
|                | R | TTGCTCCCAAATGTCCACTCA  |

Continued Table S1

| Gene name      |   | Primer sequences      |
|----------------|---|-----------------------|
| <i>Rnf112</i>  | F | AGATGTTCGTTACGTGGCT   |
|                | R | GTGCCCTTGCCCTGACTTAT  |
| <i>Nanos1</i>  | F | GCGCTCTACACCACACACAT  |
|                | R | TTTGGAGAGCGGGCAATACT  |
| <i>Sarnp</i>   | F | GGAGCTCCACAAGCTGAAG   |
|                | R | CCGATGCCATATCAACAGCC  |
| <i>Tmem62</i>  | F | TGCTGTTGGAGCACTACGG   |
|                | R | GATGTTGTTGGCTTCCGAGC  |
| <i>Kcnh2</i>   | F | TCACGTA CTGTGACCTGCAC |
|                | R | TGTGTCCTTGTCTGTACGCC  |
| <i>Tkfc</i>    | F | TGCTGGATCGGATATGCACC  |
|                | R | ACAATCCCCATCACCAGCAG  |
| <i>Clu1</i>    | F | ATCGGCTTCCCACACAAGAG  |
|                | R | CCCATAGTGGGAGGGAGACA  |
| <i>Mmp13</i>   | F | CTTCTGGCACACGCTTTTCC  |
|                | R | TGGCTTTTGCCAGTGTAGGT  |
| <i>Akr1c18</i> | F | TAGGCCAGGCCATTCTAAGC  |
|                | R | CTCCATGGCCTTCAGAGACAC |
| <i>Slpi</i>    | F | AAGCCACAATGCCGTACTGA  |
|                | R | CACACTGGTTTGCGAATGGG  |
| <i>Vnn1</i>    | F | TACTTTCCTCGCGGCTGTTT  |
|                | R | TGCTTCGCTGCAGATACGAT  |
| <i>Saa3</i>    | F | CAGCCAAAGATGGGTCCAGT  |
|                | R | CTCCGGGCAGCATCATAGTT  |
| <i>Lrsam1</i>  | F | GATGCATCGGCAGATCAGGA  |
|                | R | TCCTGCTTCGTTTCGCTCTT  |
| <i>Nqo1</i>    | F | CATTGCAGTGGTTTGGGGTG  |
|                | R | TCTGGAAAGGACCGTTGTCTG |
| <i>Prg4</i>    | F | CGGGCTGGATAATGCTATTCC |
|                | R | CTAATGTCCCATTGCGCAGC  |
| <i>Aldh1a1</i> | F | GGCCAAATCATCCCCTGGAA  |
|                | R | ATGTTTACCACGCCAGGAGG  |

**Table S2. Gene expression in RNA sequencing data.**

| Gene Name    | Gene ID            | log2 Fold Change | Adjusted P  |
|--------------|--------------------|------------------|-------------|
| <i>Prmt7</i> | ENSMUSG00000060098 | -0.762367163     | 1.49E-17    |
| <i>Ccna2</i> | ENSMUSG00000027715 | -0.398211242     | 3.34E-26    |
| <i>Ccnb1</i> | ENSMUSG00000041431 | -0.377923453     | 2.34E-24    |
| <i>Cdk1</i>  | ENSMUSG00000019942 | -0.313085927     | 3.96E-17    |
| <i>Cdk2</i>  | ENSMUSG00000025358 | -0.307024767     | 3.40E-10    |
| <i>Akt3</i>  | ENSMUSG00000019699 | -0.144156259     | 0.043220681 |

Adjusted P < 0.05 is considered as significant difference.
